# Supplementary material
Source: PubMed Central journal article supplement (PMC10363474)

# Supplemental Figure 1 (goes with Figure 3)

## A Pathways induced by O<sub>2</sub> in WT and mitigated in *Cyp1b1*-null mice (49 pathways)

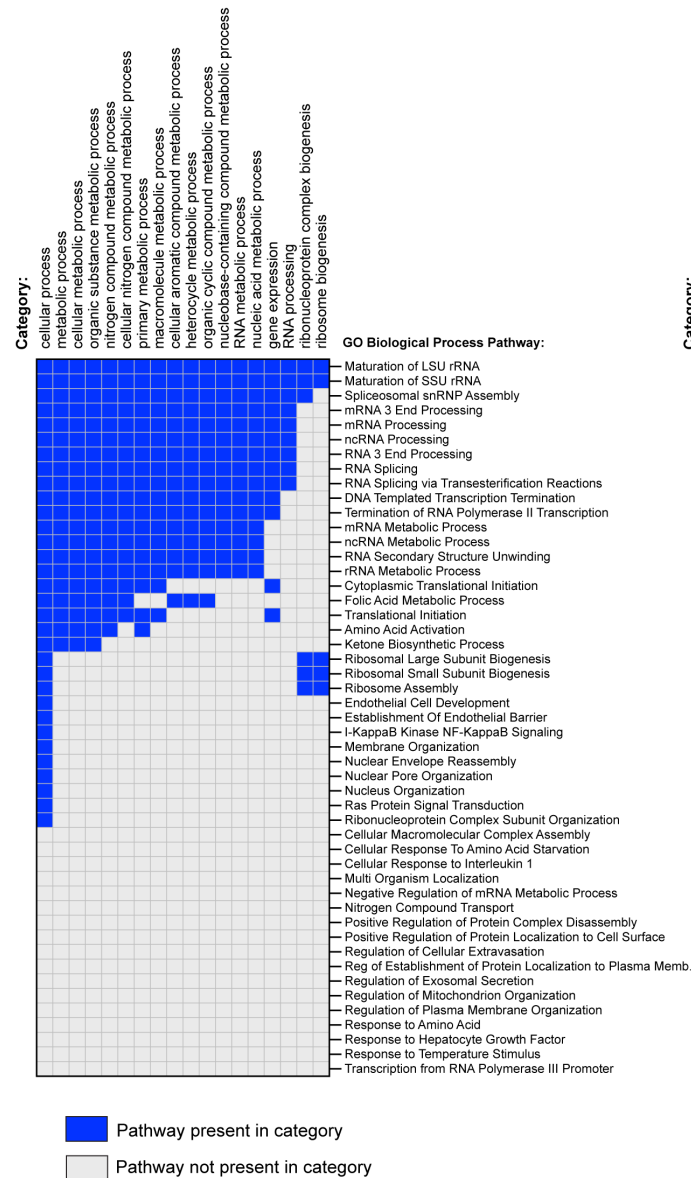

## B Pathways suppressed by O<sub>2</sub> in WT and mitigated in *Cyp1b1*-null mice (69 pathways)

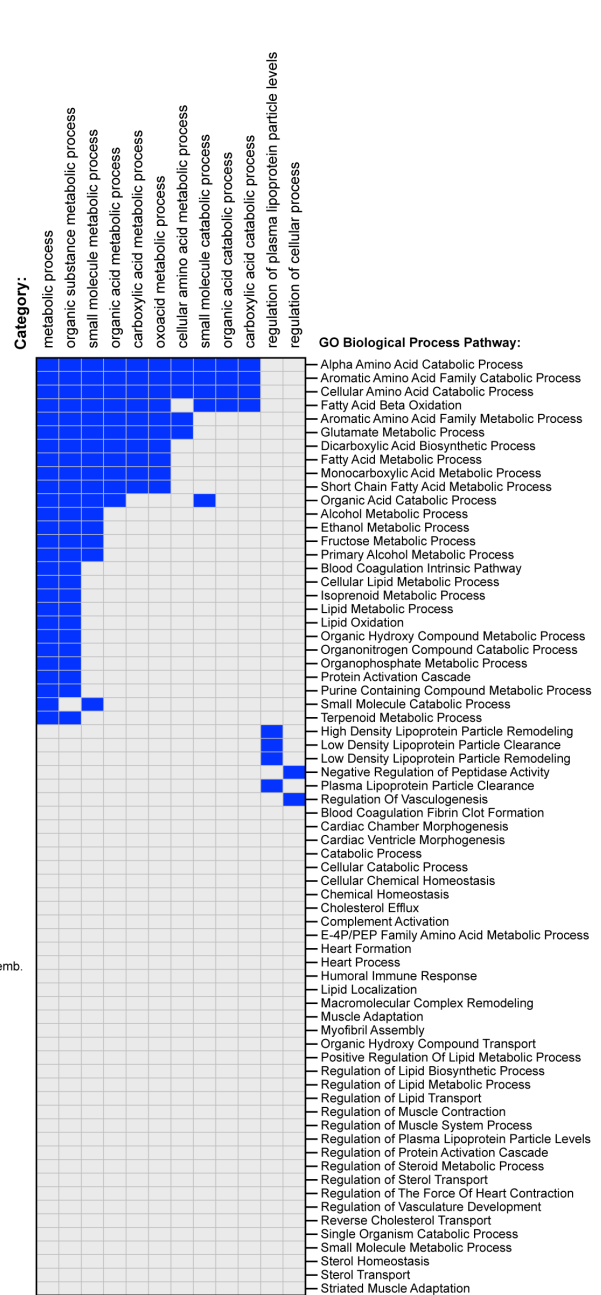

Supplemental Figure 2 (goes with Figure 6)

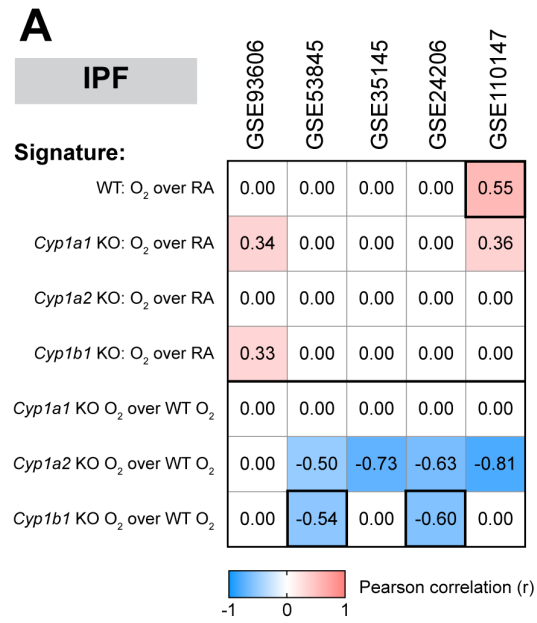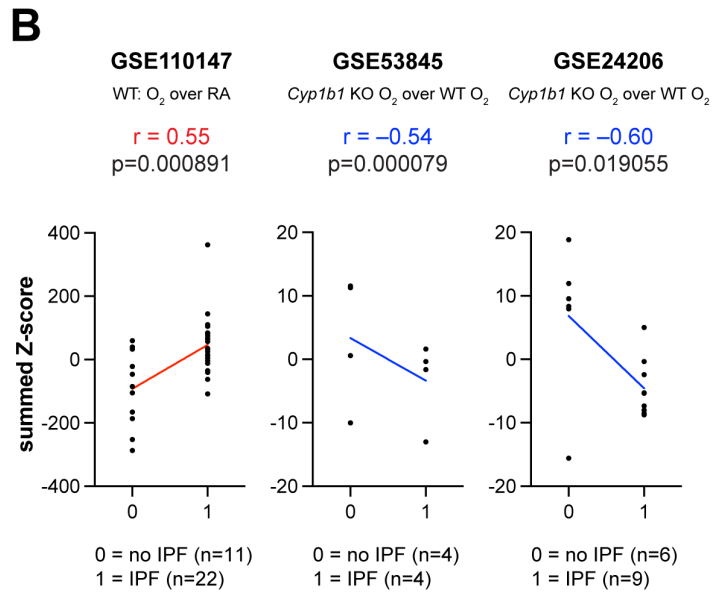

Supplement: mmc1.pdf [file mmc1.pdf]
